# Supplementary material for: Modified separators coated with a Ca(OH)2–carbon framework derived from crab shells for lithium–sulfur batteries
Source: Royal Society of Chemistry journal article supplement (doi:10.1039/c6ta06828f), 2016-01-01
Supplement: c6ta06828f1.pdf [file c6ta06828f1.pdf]

# Modified Separator Coated with a $\text{Ca}(\text{OH})_2$ -Carbon Framework Derived from Crab Shells for Lithium-Sulfur Batteries

Hongyuan Shao,<sup>a</sup> Bicheng Huang,<sup>a</sup> Naiqiang Liu,<sup>a</sup> Weikun Wang,<sup>b</sup> Hao Zhang,<sup>b</sup> Anbang Wang,<sup>b</sup> Feng Wang\*,<sup>a</sup> and Yaqin Huang\*,<sup>a</sup>.

<sup>a</sup> State Key Laboratory of Chemical Resource Engineering, Beijing Laboratory of Biomedical Materials, Beijing University of Chemical Technology. Beijing 100029, People's Republic of China. E-mail:

[huangyq@mail.buct.edu.cn](mailto:huangyq@mail.buct.edu.cn); [wangf@mail.buct.edu.cn](mailto:wangf@mail.buct.edu.cn)

<sup>b</sup> Research Institute of Chemical Defense. Beijing 100191, PR China.

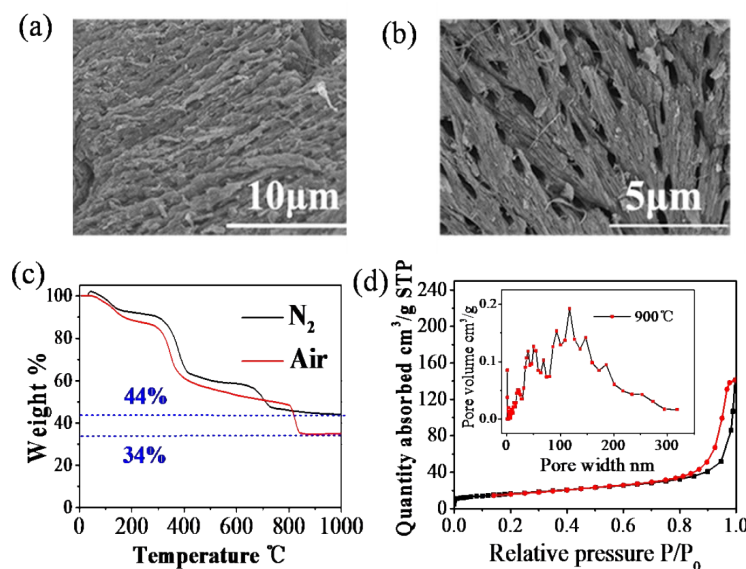

**Figure S1** (a,b) SEM image the  $\text{CaO}$ -carbon framework calcined at  $900^\circ\text{C}$ . (c) TG image of crab shells calcined in  $\text{N}_2$  atmosphere and air atmosphere, respectively. (d) The nitrogen adsorption–desorption isotherm of the CC900 and the insert is corresponding DFT pore size distribution curve.

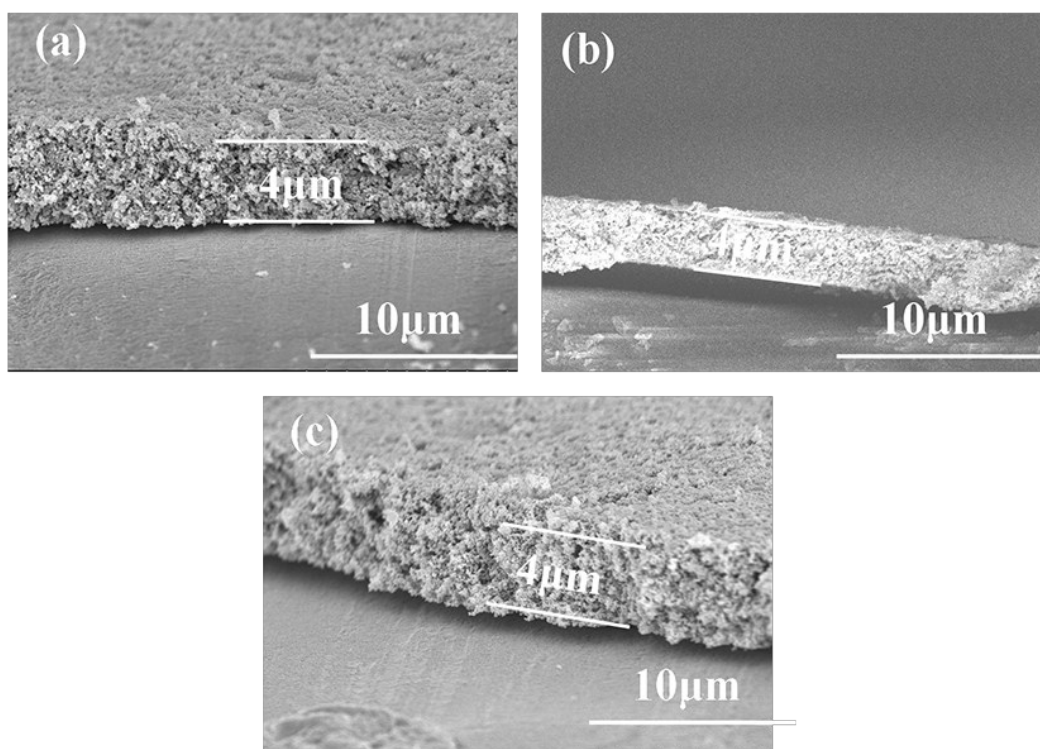

**Figure S2** Cross-sectional images of (a) CCF-modified separator, (b) Ca(OH)<sub>2</sub>-modified separator and (c) AB-modified separator.

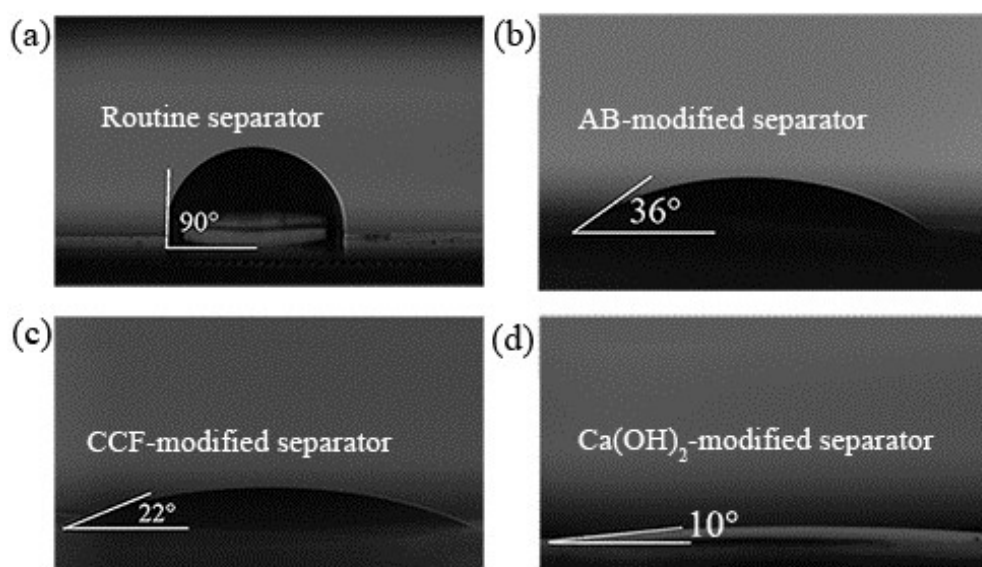

**Figure S3** The water contact angle of four types of separators.

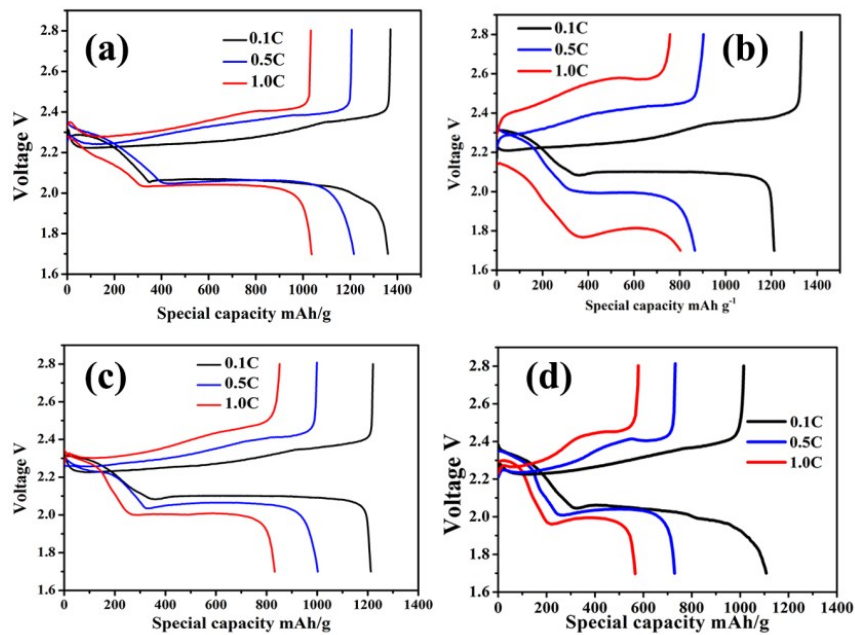

**Figure S4** Discharge-charge voltage profiles at different current rates of Li-S batteries with (a) CCF-modified separator, (b)  $\text{Ca}(\text{OH})_2$ -modified separator, (c) AB-modified separator and (d) routine separator.

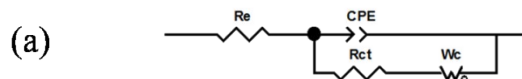

| Separator                                    | Re ( $\Omega$ ) | Rct( $\Omega$ ) |
|----------------------------------------------|-----------------|-----------------|
| CCF-modified separator                       | 4.9             | 203             |
| $\text{Ca}(\text{OH})_2$ -modified separator | 4.3             | 756             |
| Routine separator                            | 4.7             | 815             |

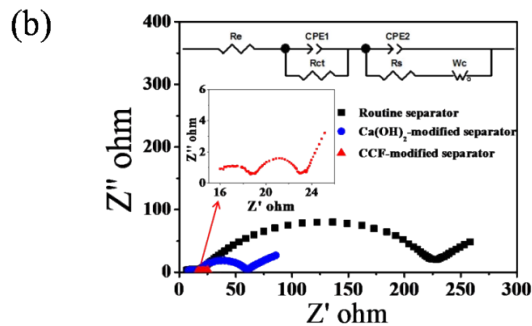

| Separator                                    | Rct( $\Omega$ ) | Rs( $\Omega$ ) |
|----------------------------------------------|-----------------|----------------|
| CCF-modified separator                       | 17              | 23             |
| $\text{Ca}(\text{OH})_2$ -modified separator | 16              | 62             |
| Routine separator                            | 17              | 227            |

**Figure S5** Equivalent circuit used to fit the EIS diagrams of different separators (a) before and (b) after cycled for 10times, and the results of the fit for the modified separators studied.

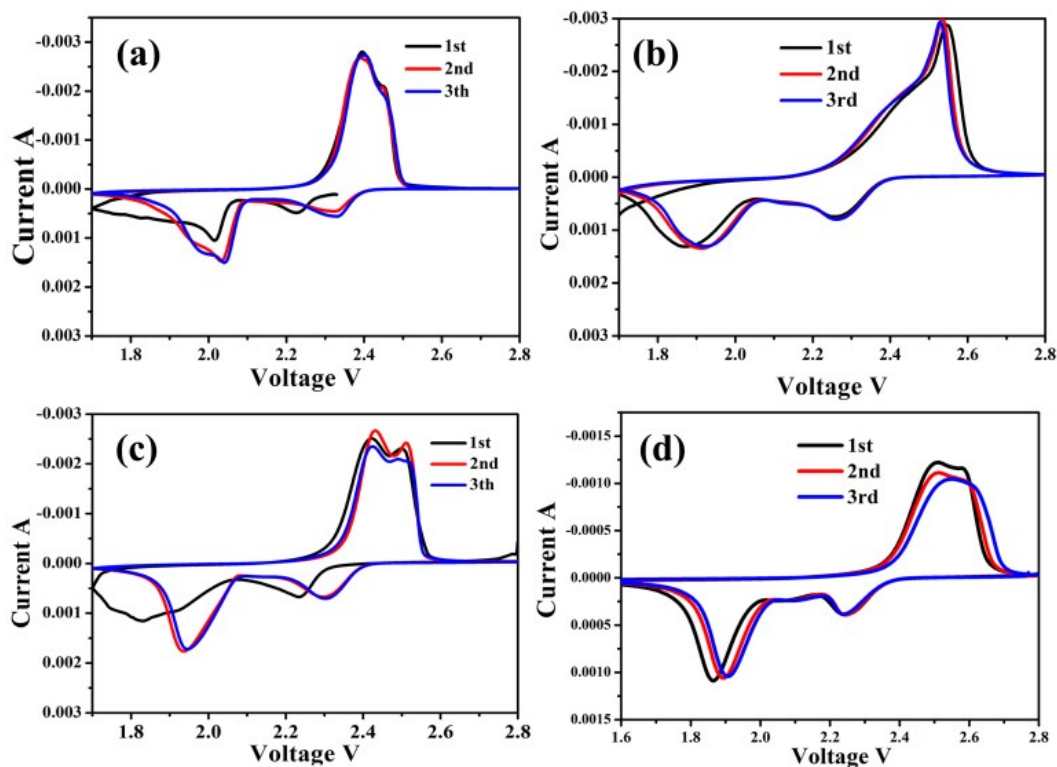

**Figure S6** The CV curves of batteries with (a) CCF-modified separator, (b)  $\text{Ca}(\text{OH})_2$ -modified separator, (c) AB-modified separator and (d) routine separator at first 3cycles

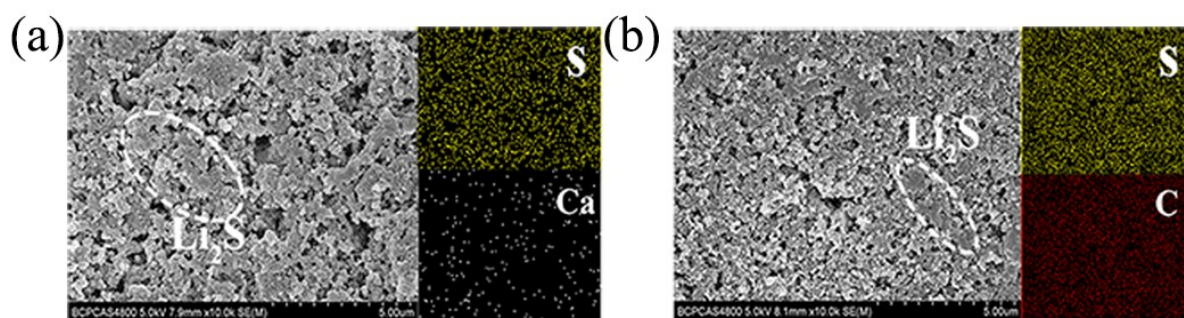

**Figure S7** SEM images of (a) the CCF-modified and (b) the AB-modified separators after being discharged 100 times; the inset image shows the EDS mapping of elements in the separator after cycling.

**Table S1** Comparison of the Li-S batteries with different modified separators, with results from this work and from the literature.

| Modified separator                       | S content (wt%) | S loading (mg cm <sup>-2</sup> ) | Coating weight (mg cm <sup>-2</sup> ) | S content with coating layer (wt%) | Initial capacity (mAh g <sup>-1</sup> ) | Cycle Numbers | Reversible capacity (mAh g <sup>-1</sup> ) | Current density | Ref.      |
|------------------------------------------|-----------------|----------------------------------|---------------------------------------|------------------------------------|-----------------------------------------|---------------|--------------------------------------------|-----------------|-----------|
| Super P                                  | 60              | 1.2                              | 0.2                                   | 55                                 | 1389                                    | 200           | 828                                        | 0.2C            | 26        |
| MWCNT                                    | 70              | 2.0                              | 0.17                                  | 65                                 | 1324                                    | 300           | 621                                        | 0.2C            | 27        |
| GO                                       | 63              | 1.3                              | 0.12                                  | 60                                 | 920                                     | 100           | 708                                        | 0.1C            | 28        |
| PAN/INF/MWCNT                            | 60              | 1.4                              | 0.01                                  | 60                                 | 1020                                    | 100           | 709                                        | 0.2C            | 29        |
| PEDOT/PSS                                | 64              | 1.0                              | 0.07                                  | 61                                 | 901                                     | 500           | 596                                        | 0.5C            | 30        |
| Nafion                                   | 50              | 0.5                              | 0.7                                   | 29                                 | 906                                     | 500           | 312                                        | 1.0C            | 31        |
| MOF@GO                                   | 70              | 1.6                              | 0.3                                   | 62                                 | 1207                                    | 1500          | 855                                        | 1.0C            | S1        |
| MesoNC                                   | 50              | 1.6                              | 0.5                                   | 43                                 | 1028                                    | 500           | 658                                        | 0.5C            | S2        |
| ACNF-filter                              | 70              | 2.1                              | 0.35                                  | 63                                 | 1300                                    | 200           | 819                                        | 0.2C            | S3        |
| MPC/PEG                                  | 70              | 2.0                              | 0.15                                  | 65                                 | 1307                                    | 500           | 596                                        | 0.2C            | S4        |
| Ca(OH) <sub>2</sub> -carbon framework/AB | 63              | 1.5                              | 0.3                                   | 57                                 | 1215                                    | 200           | 912                                        | 0.5C            | This work |
| Ca(OH) <sub>2</sub> -carbon framework/AB | 63              | 1.5                              | 0.3                                   | 57                                 | 965                                     | 200           | 770                                        | 1.0C            | This work |

## References

- S1. S. Bai, X. Liu, K. Zhu, S. Wu and H. Zhou, *Nature Energy*, 2016, **1**, 16094.
- S2. J. Balach, T. Jaumann, M. Klose, S. Oswald, J. Eckert and L. Giebeler, *Journal of Power Sources*, 2016, **303**, 317-324.
- S3. S.-H. Chung, P. Han, R. Singhal, V. Kalra and A. Manthiram, *Advanced Energy Materials*, 2015, **5**, 1500738.
- S4. S. H. Chung and A. Manthiram, *Advanced Materials*, 2014, **26**, 7352-7355.
